# Supplementary material for: Dipole moment enhanced π–π stacking in fluorophenylacetylenes is carried over from gas-phase dimers to crystal structures propagated through liquid like clusters
Source: Royal Society of Chemistry journal article supplement (doi:10.1039/d1cp00279a), 2021-01-01
Supplement: d1cp00279a2.zip [file d1cp00279a2.zip]

Tetramers

2FPHA

2Te1

C -0.007325000 4.803730000 -1.879918000

C 0.760457000 4.103926000 -1.234041000

C 1.617531000 3.236524000 -0.492370000

C 1.963564000 3.510520000 0.850567000

C 2.125287000 2.039101000 -1.060060000

C 2.758781000 2.654314000 1.614146000

C 2.918502000 1.164056000 -0.308949000

C 3.236106000 1.469137000 1.027180000

H -0.651224000 5.442831000 -2.453195000

F 1.481205000 4.646039000 1.432685000

H 1.862835000 1.791582000 -2.090542000

H 2.980756000 2.915672000 2.651745000

H 3.275269000 0.234799000 -0.758464000

H 3.843505000 0.777430000 1.617366000

C 1.520082000 -0.906435000 -3.074265000

C 0.374945000 -0.605552000 -2.767669000

C -0.957825000 -0.248849000 -2.403075000

C -1.323684000 1.095310000 -2.134302000

C -1.966641000 -1.229842000 -2.270782000

C -2.628159000 1.420891000 -1.748163000

C -3.273122000 -0.924263000 -1.892751000

C -3.602248000 0.414760000 -1.625131000

H 2.536719000 -1.193718000 -3.260384000

H -0.567300000 1.878038000 -2.215961000

F -1.647075000 -2.535642000 -2.514869000

H -2.878072000 2.460930000 -1.522861000

H -4.001132000 -1.730165000 -1.782535000

H -4.617685000 0.664116000 -1.303956000

C -3.488309000 -2.920625000 1.222541000

C -3.023147000 -1.793731000 1.322757000

C -2.462663000 -0.485591000 1.434872000

C -3.235632000 0.611444000 1.879012000

C -1.110768000 -0.226528000 1.097181000

C -2.716732000 1.901312000 2.000887000

C -0.571114000 1.056598000 1.220696000

C -1.368307000 2.122278000 1.670465000

H -3.905097000 -3.905591000 1.136456000

F -4.547981000 0.404539000 2.192155000

H -0.497106000 -1.046934000 0.726080000

H -3.367806000 2.707754000 2.348362000

H 0.472007000 1.221034000 0.954148000

H -0.947318000 3.128226000 1.755172000

C 4.569853000 -2.201310000 -1.427528000

C 3.589916000 -2.447350000 -0.737151000

C 2.449320000 -2.743062000 0.069015000

C 2.466432000 -2.525863000 1.465822000

C 1.258535000 -3.277852000 -0.489189000

C 1.384509000 -2.833764000 2.291844000

C 0.162113000 -3.590058000 0.322805000

C 0.225551000 -3.375736000 1.711798000

H 5.441775000 -2.003878000 -2.021191000

F 3.589144000 -1.994549000 2.032195000

H 1.207722000 -3.423359000 -1.569907000

H 1.457629000 -2.639207000 3.364658000

H -0.754967000 -3.972996000 -0.130442000

H -0.642994000 -3.594994000 2.338481000

2Te2

C -0.009695000 1.878861000 3.654703000

C -0.493131000 0.868042000 3.163854000

C -1.039740000 -0.319426000 2.590533000

C -2.405791000 -0.405700000 2.237609000

C -0.237066000 -1.464942000 2.353003000

C -2.972404000 -1.550972000 1.681608000

C -0.787577000 -2.623738000 1.794081000

C -2.151490000 -2.669014000 1.458834000

H 0.408728000 2.776488000 4.067474000

F -3.209322000 0.679769000 2.454192000

H 0.822962000 -1.425960000 2.610014000

H -4.029592000 -1.550004000 1.409121000

H -0.145455000 -3.486852000 1.601677000

H -2.580017000 -3.566735000 1.004913000

C 2.095231000 4.537544000 -2.179170000

C 1.035455000 4.056422000 -1.802422000

C -0.199989000 3.486518000 -1.369577000

C -1.149811000 2.974355000 -2.292833000

C -0.531774000 3.410301000 0.002462000

C -2.354590000 2.415902000 -1.849608000

C -1.719769000 2.844818000 0.465945000

C -2.636684000 2.344268000 -0.472787000

H 3.015142000 4.980543000 -2.509499000

H -0.914223000 3.020221000 -3.359439000

F 0.351201000 3.915107000 0.913910000

H -3.061451000 2.001679000 -2.572868000

H -1.903029000 2.782786000 1.539631000

H -3.558088000 1.872791000 -0.122855000

C -4.380203000 -0.769713000 -1.754652000

C -3.223012000 -1.163760000 -1.708207000

C -1.872155000 -1.618306000 -1.626655000

C -1.536261000 -2.968182000 -1.876841000

C -0.813544000 -0.746182000 -1.268149000

C -0.229657000 -3.451030000 -1.788880000

C 0.501164000 -1.211339000 -1.176646000

C 0.798654000 -2.560375000 -1.435491000

H -5.395578000 -0.428480000 -1.817731000

F -2.533131000 -3.842230000 -2.202740000

H -1.044776000 0.296787000 -1.051996000

H -0.036536000 -4.507452000 -1.993317000

H 1.292689000 -0.517235000 -0.897079000

H 1.827899000 -2.922583000 -1.354858000

C 4.886723000 -3.435108000 -0.559313000

C 4.447864000 -2.310518000 -0.361361000

C 3.901512000 -1.006915000 -0.161662000

C 3.263504000 -0.654160000 1.049372000

C 3.946545000 -0.018364000 -1.180022000

C 2.678252000 0.594416000 1.262123000

C 3.367398000 1.241795000 -0.985219000

C 2.731957000 1.548539000 0.231833000

H 5.300780000 -4.412471000 -0.717811000

F 3.200781000 -1.583735000 2.047440000

H 4.430055000 -0.271897000 -2.127133000

H 2.170525000 0.802225000 2.206757000

H 3.387564000 1.985808000 -1.785663000

H 2.267147000 2.525918000 0.376627000

2Te 3

C 2.061780000 -4.548442000 -2.177821000

C 1.005250000 -4.060487000 -1.800740000

C -0.226588000 -3.483288000 -1.367244000

C -0.556290000 -3.403170000 0.005092000

C -1.175041000 -2.968013000 -2.290181000

C -1.741161000 -2.831540000 0.469053000

C -2.376731000 -2.403366000 -1.846460000

C -2.657018000 -2.328536000 -0.469448000

H 2.978685000 -4.997253000 -2.508649000

F 0.325374000 -3.910689000 0.916269000

H -0.940899000 -3.016714000 -3.356978000

H -1.922959000 -2.766792000 1.542831000

H -3.082519000 -1.987075000 -2.569569000

H -3.576087000 -1.852722000 -0.119265000

C 4.904615000 3.405194000 -0.564072000

C 4.460310000 2.282813000 -0.365693000

C 3.907635000 0.981989000 -0.165307000

C 3.944583000 -0.006100000 -1.184430000

C 3.271377000 0.631664000 1.047380000

C 3.359823000 -1.263519000 -0.988693000

C 2.680501000 -0.614115000 1.261042000

C 2.726499000 -1.567899000 0.230052000

H 5.323453000 4.380457000 -0.722946000

H 4.426364000 0.245706000 -2.132887000

F 3.216374000 1.560822000 2.046280000

H 3.373981000 -2.007040000 -1.789719000

H 2.174337000 -0.819752000 2.206983000

H 2.257499000 -2.543154000 0.375673000

C -4.378580000 0.795506000 -1.746619000

C -3.218177000 1.180305000 -1.702840000

C -1.863768000 1.624767000 -1.624600000

C -1.517890000 2.970828000 -1.881867000

C -0.811480000 0.746550000 -1.262414000

C -0.207648000 3.444284000 -1.797291000

C 0.506774000 1.202306000 -1.174195000

C 0.814218000 2.547703000 -1.440118000

H -5.396715000 0.462152000 -1.807255000

F -2.508405000 3.850668000 -2.211545000

H -1.050220000 -0.293525000 -1.040599000

H -0.006720000 4.498163000 -2.007239000

H 1.293191000 0.503712000 -0.891434000

H 1.846174000 2.902656000 -1.362013000

C -0.017619000 -1.874461000 3.654458000

C -0.494191000 -0.860306000 3.163787000

C -1.033175000 0.330805000 2.590786000

C -2.399313000 0.426899000 2.240825000

C -0.222591000 1.470119000 2.350406000

C -2.958712000 1.575847000 1.685070000

C -0.765716000 2.632454000 1.791581000

C -2.130031000 2.687574000 1.459339000

H 0.394713000 -2.774999000 4.067004000

F -3.210329000 -0.652427000 2.460160000

H 0.837730000 1.423506000 2.604952000

H -4.016501000 1.582390000 1.414999000

H -0.117611000 3.490561000 1.596835000

H -2.552905000 3.588161000 1.005765000

2Te4

C 0.894147000 4.043994000 2.583462000

C 0.025411000 3.669293000 1.808159000

C -0.971125000 3.199530000 0.900760000

C -1.231097000 3.875832000 -0.313056000

C -1.725964000 2.026679000 1.164945000

C -2.177254000 3.430877000 -1.237582000

C -2.680595000 1.565449000 0.250058000

C -2.905521000 2.263363000 -0.950334000

H 1.637901000 4.389758000 3.275484000

F -0.514815000 5.000088000 -0.602587000

H -1.539488000 1.474817000 2.089264000

H -2.323746000 3.991933000 -2.163833000

H -3.244872000 0.656610000 0.467044000

H -3.637986000 1.885103000 -1.668530000

C -5.149080000 -0.458079000 -2.216742000

C -4.193715000 -1.124047000 -1.842231000

C -3.075064000 -1.901412000 -1.414863000

C -2.157668000 -2.461636000 -2.342610000

C -2.837542000 -2.153990000 -0.044343000

C -1.067025000 -3.223461000 -1.904747000

C -1.748176000 -2.894312000 0.413675000

C -0.857024000 -3.432498000 -0.528741000

H -6.000025000 0.107486000 -2.544924000

H -2.321993000 -2.282608000 -3.408593000

F -3.716227000 -1.650755000 0.871161000

H -0.367000000 -3.638150000 -2.635377000

H -1.602436000 -3.029600000 1.486130000

H 0.006687000 -4.004745000 -0.180409000

C -1.685895000 -0.934778000 3.638268000

C -0.572833000 -0.951279000 3.131188000

C 0.721298000 -0.947085000 2.528872000

C 1.376916000 -2.148827000 2.178578000

C 1.405373000 0.265594000 2.254071000

C 2.637316000 -2.177323000 1.582460000

C 2.671824000 0.256941000 1.661147000

C 3.288482000 -0.959963000 1.322363000

H -2.667526000 -0.929866000 4.071495000

F 0.751892000 -3.338227000 2.437083000

H 0.924779000 1.212517000 2.507992000

H 3.087571000 -3.138567000 1.323168000

H 3.166799000 1.204179000 1.435455000

H 4.267018000 -0.965430000 0.834563000

C 5.932556000 -0.445248000 -2.035948000

C 4.763929000 -0.097681000 -1.932762000

C 3.407987000 0.314714000 -1.764025000

C 2.349909000 -0.622122000 -1.765577000

C 3.066682000 1.675991000 -1.549676000

C 1.020471000 -0.259053000 -1.557354000

C 1.737210000 2.060288000 -1.339167000

C 0.716050000 1.093418000 -1.343300000

H 6.954911000 -0.746702000 -2.161041000

F 2.644231000 -1.940632000 -1.962059000

H 3.870909000 2.416821000 -1.541679000

H 0.247140000 -1.028604000 -1.552284000

H 1.496929000 3.111527000 -1.161306000

H -0.321203000 1.384254000 -1.174688000

2Te5

C 0.894147000 4.043994000 2.583462000

C 0.025411000 3.669293000 1.808159000

C -0.971125000 3.199530000 0.900760000

C -1.231097000 3.875832000 -0.313056000

C -1.725964000 2.026679000 1.164945000

C -2.177254000 3.430877000 -1.237582000

C -2.680595000 1.565449000 0.250058000

C -2.905521000 2.263363000 -0.950334000

H 1.637901000 4.389758000 3.275484000

F -0.514815000 5.000088000 -0.602587000

H -1.539488000 1.474817000 2.089264000

H -2.323746000 3.991933000 -2.163833000

H -3.244872000 0.656610000 0.467044000

H -3.637986000 1.885103000 -1.668530000

C -5.149080000 -0.458079000 -2.216742000

C -4.193715000 -1.124047000 -1.842231000

C -3.075064000 -1.901412000 -1.414863000

C -2.157668000 -2.461636000 -2.342610000

C -2.837542000 -2.153990000 -0.044343000

C -1.067025000 -3.223461000 -1.904747000

C -1.748176000 -2.894312000 0.413675000

C -0.857024000 -3.432498000 -0.528741000

H -6.000025000 0.107486000 -2.544924000

H -2.321993000 -2.282608000 -3.408593000

F -3.716227000 -1.650755000 0.871161000

H -0.367000000 -3.638150000 -2.635377000

H -1.602436000 -3.029600000 1.486130000

H 0.006687000 -4.004745000 -0.180409000

C -1.685895000 -0.934778000 3.638268000

C -0.572833000 -0.951279000 3.131188000

C 0.721298000 -0.947085000 2.528872000

C 1.376916000 -2.148827000 2.178578000

C 1.405373000 0.265594000 2.254071000

C 2.637316000 -2.177323000 1.582460000

C 2.671824000 0.256941000 1.661147000

C 3.288482000 -0.959963000 1.322363000

H -2.667526000 -0.929866000 4.071495000

F 0.751892000 -3.338227000 2.437083000

H 0.924779000 1.212517000 2.507992000

H 3.087571000 -3.138567000 1.323168000

H 3.166799000 1.204179000 1.435455000

H 4.267018000 -0.965430000 0.834563000

C 5.932556000 -0.445248000 -2.035948000

C 4.763929000 -0.097681000 -1.932762000

C 3.407987000 0.314714000 -1.764025000

C 2.349909000 -0.622122000 -1.765577000

C 3.066682000 1.675991000 -1.549676000

C 1.020471000 -0.259053000 -1.557354000

C 1.737210000 2.060288000 -1.339167000

C 0.716050000 1.093418000 -1.343300000

H 6.954911000 -0.746702000 -2.161041000

F 2.644231000 -1.940632000 -1.962059000

H 3.870909000 2.416821000 -1.541679000

H 0.247140000 -1.028604000 -1.552284000

H 1.496929000 3.111527000 -1.161306000

H -0.321203000 1.384254000 -1.174688000

2Te6

C -1.868962000 2.458213000 1.308327000

C -0.734459000 2.705565000 0.925071000

C 0.597884000 2.947241000 0.474796000

C 0.852743000 3.481078000 -0.809601000

C 1.723856000 2.646954000 1.283995000

C 2.144136000 3.692746000 -1.295579000

C 3.026961000 2.857514000 0.816888000

C 3.239271000 3.377047000 -0.473172000

H -2.873323000 2.241855000 1.619520000

F -0.202198000 3.810888000 -1.603696000

H 1.563685000 2.229639000 2.279543000

H 2.275284000 4.096322000 -2.302640000

H 3.874116000 2.600786000 1.458719000

H 4.255679000 3.534294000 -0.846557000

C -4.433090000 2.284353000 -1.336169000

C -4.283405000 1.173278000 -0.847716000

C -4.075728000 -0.124605000 -0.292532000

C -3.642040000 -1.213952000 -1.092431000

C -4.287196000 -0.378797000 1.081388000

C -3.449884000 -2.482842000 -0.533799000

C -4.096662000 -1.634637000 1.657902000

C -3.676757000 -2.695198000 0.837782000

H -4.567093000 3.263069000 -1.755900000

H -3.449274000 -1.037047000 -2.152789000

F -4.690210000 0.652798000 1.881970000

H -3.111948000 -3.305906000 -1.169585000

H -4.269739000 -1.764823000 2.728885000

H -3.513987000 -3.683140000 1.278144000

C -1.034567000 0.770653000 -2.077103000

C -0.008615000 0.106978000 -2.070814000

C 1.202670000 -0.641041000 -1.989968000

C 1.359750000 -1.883632000 -2.641947000

C 2.295096000 -0.174749000 -1.215793000

C 2.529653000 -2.639502000 -2.556965000

C 3.474163000 -0.920565000 -1.111464000

C 3.595792000 -2.150464000 -1.782562000

H -1.923771000 1.371582000 -2.043770000

F 0.317057000 -2.377612000 -3.373873000

H 2.189739000 0.772859000 -0.686805000

H 2.589941000 -3.594277000 -3.086107000

H 4.295293000 -0.549033000 -0.491970000

H 4.515062000 -2.738096000 -1.698352000

C 3.223543000 0.398281000 3.884935000

C 2.501284000 -0.255826000 3.144619000

C 1.648471000 -0.987488000 2.264161000

C 2.061781000 -2.211026000 1.690643000

C 0.357386000 -0.511445000 1.915133000

C 1.256837000 -2.943280000 0.818292000

C -0.459053000 -1.225916000 1.033891000

C -0.011707000 -2.441196000 0.488264000

H 3.850311000 0.947678000 4.560751000

F 3.303234000 -2.690460000 1.990807000

H 0.009875000 0.435010000 2.333376000

H 1.640813000 -3.872026000 0.390926000

H -1.432338000 -0.822882000 0.751770000

H -0.644188000 -2.988816000 -0.214839000

2Te7

C -1.059064000 -2.841517000 -0.526807000

C -1.954852000 -2.319422000 0.121427000

C -2.991352000 -1.676630000 0.861792000

C -4.342579000 -1.765187000 0.455047000

C -2.713127000 -0.896449000 2.013459000

C -5.379803000 -1.121029000 1.132500000

C -3.739088000 -0.242247000 2.706323000

C -5.071589000 -0.352340000 2.268554000

H -0.259505000 -3.304478000 -1.079072000

F -4.645657000 -2.494910000 -0.654363000

H -1.675603000 -0.800127000 2.340692000

H -6.403878000 -1.225495000 0.765282000

H -3.498478000 0.357999000 3.588534000

H -5.875127000 0.158636000 2.807730000

C 1.833784000 -4.667373000 -2.101139000

C 2.190015000 -3.516131000 -1.887636000

C 2.593299000 -2.173694000 -1.615884000

C 3.664248000 -1.884540000 -0.730433000

C 1.940217000 -1.074552000 -2.218696000

C 4.047503000 -0.563223000 -0.474130000

C 2.307445000 0.248066000 -1.976672000

C 3.371018000 0.500672000 -1.096256000

H 1.542649000 -5.680014000 -2.305405000

H 4.174025000 -2.717948000 -0.240385000

F 0.901973000 -1.318863000 -3.073241000

H 4.857225000 -0.360957000 0.231978000

H 1.763371000 1.062340000 -2.458251000

H 3.650579000 1.534714000 -0.878392000

C 1.253324000 3.772471000 -2.924649000

C 0.270931000 3.256781000 -2.409603000

C -0.858939000 2.632229000 -1.801184000

C -1.565106000 3.265854000 -0.753549000

C -1.312133000 1.348960000 -2.205460000

C -2.663332000 2.682212000 -0.122468000

C -2.414433000 0.748154000 -1.585155000

C -3.090913000 1.413405000 -0.546859000

H 2.098272000 4.239391000 -3.393448000

F -1.144564000 4.492616000 -0.329309000

H -0.772738000 0.828123000 -2.999748000

H -3.162100000 3.217618000 0.689055000

H -2.731537000 -0.250389000 -1.894804000

H -3.941162000 0.940725000 -0.050519000

C 5.194037000 0.786977000 3.673557000

C 4.105918000 0.771516000 3.114332000

C 2.855738000 0.763999000 2.425874000

C 2.178783000 -0.444648000 2.146331000

C 2.255517000 1.963036000 1.960587000

C 0.981118000 -0.491718000 1.433815000

C 1.052302000 1.936508000 1.245769000

C 0.416292000 0.710512000 0.979458000

H 6.135144000 0.800061000 4.189207000

F 2.730796000 -1.615717000 2.572122000

H 2.762977000 2.910074000 2.164107000

H 0.516958000 -1.456652000 1.220562000

H 0.618787000 2.871530000 0.884196000

H -0.513867000 0.682809000 0.408353000

2Te8

C 2.297056000 -3.145515000 -1.672671000

C 1.193244000 -3.283462000 -1.165000000

C -0.104892000 -3.418262000 -0.589010000

C -0.282016000 -3.600795000 0.800795000

C -1.278357000 -3.348911000 -1.381919000

C -1.537660000 -3.703165000 1.398121000

C -2.548415000 -3.451116000 -0.802852000

C -2.680455000 -3.625676000 0.585323000

H 3.276715000 -3.000288000 -2.085569000

F 0.824925000 -3.673936000 1.600495000

H -1.167334000 -3.190790000 -2.457083000

H -1.606987000 -3.832204000 2.481051000

H -3.438893000 -3.371081000 -1.432214000

H -3.671835000 -3.681213000 1.042628000

C -3.992745000 -0.375602000 1.949975000

C -3.164882000 -0.267185000 1.056079000

C -2.185942000 -0.151237000 0.025581000

C -0.799873000 -0.097224000 0.321676000

C -2.553083000 -0.091293000 -1.335589000

C 0.153063000 0.008342000 -0.694614000

C -1.618573000 0.015299000 -2.365419000

C -0.254058000 0.064418000 -2.037464000

H -4.723180000 -0.464185000 2.730462000

H -0.487976000 -0.139246000 1.366734000

F -3.878023000 -0.144300000 -1.661623000

H 1.211560000 0.050507000 -0.439774000

H -1.967387000 0.058699000 -3.400097000

H 0.490555000 0.149687000 -2.833042000

C 1.702652000 3.397937000 -1.263182000

C 0.557228000 3.382899000 -0.835297000

C -0.781012000 3.331366000 -0.344786000

C -1.054796000 3.271193000 1.040492000

C -1.895381000 3.308637000 -1.220898000

C -2.347594000 3.188816000 1.554696000

C -3.202414000 3.226424000 -0.725419000

C -3.429949000 3.164392000 0.659797000

H 2.722890000 3.360231000 -1.597980000

F -0.006215000 3.283464000 1.916840000

H -1.707672000 3.338807000 -2.296920000

H -2.491691000 3.127461000 2.635997000

H -4.044926000 3.191728000 -1.421607000

H -4.448198000 3.077456000 1.048793000

C 5.302086000 2.317306000 -1.384909000

C 4.647294000 1.643129000 -0.601174000

C 3.864700000 0.871411000 0.310447000

C 3.910804000 -0.541864000 0.301510000

C 3.003398000 1.486446000 1.256231000

C 3.152431000 -1.328916000 1.167785000

C 2.240109000 0.713621000 2.139121000

C 2.313388000 -0.690148000 2.095628000

H 5.904384000 2.900285000 -2.055125000

F 4.725175000 -1.162433000 -0.601736000

H 2.928739000 2.575419000 1.265724000

H 3.200597000 -2.415798000 1.090367000

H 1.571395000 1.211703000 2.845348000

H 1.704331000 -1.299938000 2.768186000

2Te9

C -5.875446000 0.460449000 -1.943840000

C -4.669492000 0.634977000 -1.832659000

C -3.269567000 0.848733000 -1.654319000

C -2.359598000 -0.232431000 -1.626949000

C -2.735744000 2.150005000 -1.461368000

C -0.993321000 -0.062651000 -1.410179000

C -1.365756000 2.341638000 -1.245799000

C -0.497386000 1.235754000 -1.220954000

H -6.929618000 0.309620000 -2.076651000

F -2.842596000 -1.496966000 -1.803914000

H -3.423892000 2.999774000 -1.476493000

H -0.339881000 -0.935147000 -1.382204000

H -0.973425000 3.350297000 -1.089447000

H 0.570225000 1.376227000 -1.051214000

C 0.609709000 5.962401000 -0.093934000

C 1.179102000 4.883207000 -0.007776000

C 1.818623000 3.608834000 0.060730000

C 2.630701000 3.127222000 -0.999797000

C 1.647177000 2.758773000 1.177080000

C 3.220206000 1.858411000 -0.934344000

C 2.223455000 1.490811000 1.260386000

C 3.017067000 1.040258000 0.191880000

H 0.132660000 6.921909000 -0.153530000

H 2.771704000 3.765989000 -1.875695000

F 0.870638000 3.193437000 2.212319000

H 3.824302000 1.490111000 -1.767582000

H 2.035264000 0.864672000 2.135783000

H 3.466526000 0.046393000 0.235022000

C 4.756202000 -1.225070000 -2.408617000

C 3.725572000 -1.762040000 -2.026674000

C 2.516478000 -2.381383000 -1.587215000

C 2.276974000 -2.633703000 -0.216831000

C 1.504989000 -2.776514000 -2.502312000

C 1.100562000 -3.216936000 0.253495000

C 0.324239000 -3.380689000 -2.052741000

C 0.117664000 -3.592450000 -0.676756000

H 5.670685000 -0.775976000 -2.745756000

F 3.244264000 -2.295823000 0.685446000

H 1.668276000 -2.593630000 -3.567733000

H 0.961619000 -3.357214000 1.326439000

H -0.447290000 -3.665780000 -2.772991000

H -0.814144000 -4.037516000 -0.318441000

C 1.541286000 -1.500519000 3.599581000

C 0.446620000 -1.230600000 3.124902000

C -0.824056000 -0.898408000 2.565868000

C -1.744709000 -1.899819000 2.182892000

C -1.218275000 0.451138000 2.371338000

C -2.993563000 -1.609692000 1.635156000

C -2.468619000 0.761661000 1.826435000

C -3.356142000 -0.264154000 1.457858000

H 2.504235000 -1.746399000 4.003974000

F -1.398944000 -3.211644000 2.359340000

H -0.524658000 1.246166000 2.651092000

H -3.657235000 -2.427969000 1.346059000

H -2.741976000 1.806973000 1.664380000

H -4.323353000 -0.022816000 1.009041000

2Te10

C -1.508402000 -3.466923000 -1.379716000

C -0.412027000 -3.412943000 -0.840990000

C 0.868309000 -3.312255000 -0.220746000

C 1.006407000 -3.309954000 1.185659000

C 2.055637000 -3.175421000 -0.983266000

C 2.237801000 -3.176446000 1.825973000

C 3.301878000 -3.037306000 -0.360852000

C 3.394961000 -3.036183000 1.041413000

H -2.493024000 -3.463895000 -1.809380000

F -0.116542000 -3.433665000 1.955745000

H 1.971414000 -3.155942000 -2.072302000

H 2.276422000 -3.173071000 2.918221000

H 4.199892000 -2.903538000 -0.969627000

H 4.365588000 -2.910986000 1.529972000

C -5.110766000 -2.482410000 -1.704896000

C -4.524083000 -1.795343000 -0.879579000

C -3.824773000 -1.005268000 0.082661000

C -2.992148000 -1.597373000 1.068064000

C -3.930427000 0.404807000 0.088171000

C -2.313420000 -0.805885000 2.001991000

C -3.256669000 1.210453000 1.006031000

C -2.444331000 0.594171000 1.971824000

H -5.652926000 -3.078468000 -2.413894000

H -2.871025000 -2.682046000 1.069116000

F -4.718977000 1.003740000 -0.851320000

H -1.666004000 -1.286805000 2.739387000

H -3.349074000 2.295136000 0.940997000

H -1.902830000 1.219444000 2.686859000

C -2.346033000 3.145549000 -1.747407000

C -1.296573000 3.297556000 -1.138641000

C -0.059562000 3.445557000 -0.443384000

C -0.015684000 3.640449000 0.955201000

C 1.183647000 3.374457000 -1.121515000

C 1.178067000 3.752064000 1.667841000

C 2.393141000 3.483025000 -0.426101000

C 2.393004000 3.669981000 0.967010000

H -3.280162000 2.987601000 -2.251188000

F -1.193549000 3.717813000 1.646225000

H 1.175535000 3.203587000 -2.200206000

H 1.144100000 3.896484000 2.750751000

H 3.338707000 3.392456000 -0.967024000

H 3.337331000 3.736635000 1.514843000

C 5.324792000 0.444265000 -1.465174000

C 4.119416000 0.335173000 -1.285068000

C 2.711197000 0.215333000 -1.094105000

C 2.142617000 0.215341000 0.198096000

C 1.821510000 0.097107000 -2.192763000

C 0.770122000 0.106539000 0.414979000

C 0.441168000 -0.010788000 -1.992104000

C -0.085974000 -0.005709000 -0.689447000

H 6.382266000 0.536504000 -1.621749000

F 2.967788000 0.330614000 1.276744000

H 2.241742000 0.094059000 -3.201976000

H 0.385449000 0.110066000 1.435310000

H -0.227999000 -0.101203000 -2.851529000

H -1.160703000 -0.092252000 -0.528091000

2Te11

C 1.969184000 -4.577295000 -1.381619000

C 1.585685000 -3.575982000 -0.792358000

C 1.134245000 -2.417965000 -0.093079000

C 0.439671000 -1.384642000 -0.760418000

C 1.359028000 -2.256663000 1.296868000

C -0.020605000 -0.243088000 -0.109709000

C 0.905011000 -1.116408000 1.968242000

C 0.215700000 -0.111830000 1.266924000

H 2.316808000 -5.451308000 -1.897666000

F 0.210391000 -1.510207000 -2.098791000

H 1.914469000 -3.033356000 1.826732000

H -0.548570000 0.522404000 -0.678154000

H 1.107069000 -1.000631000 3.036404000

H -0.124286000 0.787164000 1.785156000

C 5.025911000 -1.973566000 1.590047000

C 4.476893000 -1.144561000 0.877760000

C 3.834475000 -0.195410000 0.028051000

C 3.631285000 -0.457239000 -1.351536000

C 3.365198000 1.041140000 0.525436000

C 3.000340000 0.480910000 -2.176304000

C 2.731947000 1.988091000 -0.279032000

C 2.552124000 1.702052000 -1.641884000

H 5.520621000 -2.692320000 2.214225000

H 3.963660000 -1.418771000 -1.750877000

F 3.532309000 1.318269000 1.850448000

H 2.843214000 0.251450000 -3.233883000

H 2.370976000 2.916459000 0.166855000

H 2.049697000 2.435620000 -2.277349000

C 0.618227000 3.892585000 2.412056000

C -0.095669000 3.610223000 1.460101000

C -0.909054000 3.218076000 0.355190000

C -0.543868000 3.529416000 -0.974166000

C -2.102174000 2.472011000 0.538970000

C -1.284000000 3.108779000 -2.079761000

C -2.866437000 2.051828000 -0.555283000

C -2.454677000 2.361149000 -1.864141000

H 1.243926000 4.155418000 3.243481000

F 0.581360000 4.271715000 -1.188996000

H -2.408248000 2.205979000 1.553415000

H -0.941606000 3.370815000 -3.084031000

H -3.772752000 1.468898000 -0.385252000

H -3.042798000 2.019447000 -2.720882000

C -4.638594000 0.538477000 2.384166000

C -4.115821000 -0.346286000 1.720235000

C -3.483696000 -1.374219000 0.957869000

C -3.760643000 -1.552986000 -0.415981000

C -2.544760000 -2.260745000 1.547257000

C -3.148105000 -2.539176000 -1.189431000

C -1.930136000 -3.263901000 0.791715000

C -2.225350000 -3.401567000 -0.575892000

H -5.118135000 1.300403000 2.968142000

F -4.667862000 -0.725386000 -1.016971000

H -2.302919000 -2.133192000 2.605079000

H -3.392607000 -2.615907000 -2.251646000

H -1.194285000 -3.921021000 1.260366000

H -1.718023000 -4.164318000 -1.173079000

2Te12

C -0.720200000 -4.238508000 -2.638538000

C -1.330626000 -3.455286000 -1.922533000

C -2.037964000 -2.550258000 -1.074477000

C -2.978048000 -1.635181000 -1.600978000

C -1.836185000 -2.535840000 0.330717000

C -3.699849000 -0.750843000 -0.799735000

C -2.545221000 -1.651072000 1.149851000

C -3.475639000 -0.760048000 0.585660000

H -0.212453000 -4.943980000 -3.268060000

F -3.182587000 -1.609731000 -2.948619000

H -1.110632000 -3.228768000 0.762436000

H -4.401653000 -0.056538000 -1.266697000

H -2.359903000 -1.642408000 2.225641000

H -4.014075000 -0.050793000 1.220470000

C 1.776868000 -1.597532000 -2.134700000

C 2.515264000 -0.667619000 -1.843210000

C 3.333062000 0.424747000 -1.426936000

C 2.831116000 1.750899000 -1.375066000

C 4.661229000 0.222182000 -0.988559000

C 3.621451000 2.801628000 -0.893503000

C 5.464032000 1.254834000 -0.502176000

C 4.935324000 2.556362000 -0.453850000

H 1.098106000 -2.396710000 -2.379295000

H 1.802065000 1.930387000 -1.693117000

F 5.174117000 -1.041862000 -1.015379000

H 3.209633000 3.814376000 -0.855404000

H 6.480354000 1.030951000 -0.168470000

H 5.552922000 3.375163000 -0.072307000

C -1.704302000 0.515638000 4.364431000

C -0.703107000 0.109693000 3.790980000

C 0.444729000 -0.326478000 3.064045000

C 0.662899000 -1.692259000 2.775462000

C 1.405018000 0.597989000 2.575176000

C 1.749150000 -2.141302000 2.024520000

C 2.506397000 0.166920000 1.827474000

C 2.675502000 -1.200639000 1.545692000

H -2.569066000 0.869264000 4.892311000

F -0.227870000 -2.612844000 3.246629000

H 1.255568000 1.660226000 2.785045000

H 1.855912000 -3.209661000 1.821813000

H 3.223767000 0.897311000 1.446174000

H 3.519703000 -1.539395000 0.941103000

C -3.769243000 3.795105000 1.692239000

C -3.079532000 3.184767000 0.886864000

C -2.280544000 2.441099000 -0.033215000

C -2.520710000 2.490039000 -1.425077000

C -1.233896000 1.594340000 0.414450000

C -1.782220000 1.742879000 -2.343227000

C -0.482883000 0.836241000 -0.489532000

C -0.758886000 0.906855000 -1.866128000

H -4.366186000 4.354556000 2.386729000

F -3.527467000 3.284853000 -1.889743000

H -1.050571000 1.525708000 1.488024000

H -2.026347000 1.808691000 -3.406263000

H 0.308452000 0.178611000 -0.124396000

H -0.179234000 0.303161000 -2.568461000

2Te13

C -0.423416000 5.490166000 -0.821717000

C -0.912364000 4.385882000 -1.015911000

C -1.468286000 3.084487000 -1.203432000

C -0.985694000 2.215023000 -2.207238000

C -2.512964000 2.596923000 -0.375647000

C -1.485155000 0.926633000 -2.399119000

C -3.033835000 1.310378000 -0.555745000

C -2.521071000 0.474851000 -1.564597000

H -0.010745000 6.469642000 -0.672976000

F 0.021766000 2.652831000 -3.019037000

H -2.896399000 3.248429000 0.414066000

H -1.053743000 0.291247000 -3.175037000

H -3.826539000 0.950752000 0.103582000

H -2.908746000 -0.538497000 -1.691704000

C 5.221111000 1.123671000 3.555128000

C 4.134169000 1.033235000 3.000751000

C 2.883330000 0.938459000 2.319804000

C 2.224251000 2.087574000 1.810206000

C 2.262134000 -0.310755000 2.095046000

C 1.019550000 1.975630000 1.105957000

C 1.065185000 -0.443441000 1.392454000

C 0.442070000 0.710809000 0.892379000

H 6.162694000 1.201930000 4.064021000

H 2.686340000 3.065375000 1.972577000

F 2.870114000 -1.436461000 2.565405000

H 0.538745000 2.874409000 0.713111000

H 0.644449000 -1.436673000 1.225296000

H -0.490018000 0.616288000 0.331135000

C 1.927445000 -4.736436000 -1.842789000

C 2.245497000 -3.560022000 -1.730254000

C 2.606151000 -2.187031000 -1.576611000

C 1.904310000 -1.163797000 -2.253514000

C 3.681408000 -1.790331000 -0.739931000

C 2.226585000 0.186603000 -2.126228000

C 4.020933000 -0.439933000 -0.598847000

C 3.295555000 0.546303000 -1.289665000

H 1.669277000 -5.771760000 -1.958253000

F 0.863673000 -1.514810000 -3.067092000

H 4.229518000 -2.562661000 -0.194515000

H 1.643140000 0.934997000 -2.664619000

H 4.836364000 -0.153629000 0.070607000

H 3.545381000 1.603066000 -1.163813000

C -1.002249000 -2.931972000 -0.327067000

C -1.871246000 -2.379462000 0.332499000

C -2.874331000 -1.694291000 1.081365000

C -4.239336000 -1.779167000 0.723386000

C -2.546979000 -0.871698000 2.189735000

C -5.244578000 -1.092092000 1.406324000

C -3.540326000 -0.173772000 2.887321000

C -4.888075000 -0.281729000 2.498271000

H -0.221596000 -3.417321000 -0.887185000

F -4.588803000 -2.549255000 -0.345015000

H -1.497833000 -0.777625000 2.478028000

H -6.281545000 -1.195966000 1.077310000

H -3.262296000 0.459161000 3.735008000

H -5.665872000 0.263919000 3.041147000

2Te14

C 1.697057000 -1.894523000 -3.403713000

C 2.155772000 -1.951187000 -2.271438000

C 2.692894000 -1.977004000 -0.949338000

C 4.082891000 -2.114975000 -0.731747000

C 1.867219000 -1.836433000 0.195467000

C 4.650447000 -2.114358000 0.543659000

C 2.417255000 -1.834250000 1.482241000

C 3.805493000 -1.971916000 1.658562000

H 1.286008000 -1.866946000 -4.394494000

F 4.906468000 -2.237333000 -1.811737000

H 0.790543000 -1.721816000 0.064381000

H 5.733278000 -2.220462000 0.646962000

H 1.754992000 -1.716560000 2.342886000

H 4.238296000 -1.963365000 2.663398000

C 3.110213000 2.061477000 3.338855000

C 2.901128000 2.142499000 2.136044000

C 2.665703000 2.220337000 0.730112000

C 3.269010000 1.305874000 -0.170947000

C 1.830179000 3.217525000 0.176470000

C 3.050419000 1.403613000 -1.549958000

C 1.603497000 3.333571000 -1.195477000

C 2.222084000 2.417633000 -2.062829000

H 3.306875000 2.012503000 4.392697000

H 3.900329000 0.514804000 0.237703000

F 1.215618000 4.098498000 1.015383000

H 3.509452000 0.675678000 -2.222945000

H 0.941487000 4.121097000 -1.563162000

H 2.041212000 2.489717000 -3.139163000

C -0.107624000 0.335147000 2.621784000

C -1.126567000 -0.238277000 2.263600000

C -2.333958000 -0.862017000 1.830044000

C -2.344174000 -2.174918000 1.311117000

C -3.577441000 -0.179913000 1.880048000

C -3.505156000 -2.802920000 0.860023000

C -4.754029000 -0.790886000 1.433320000

C -4.719780000 -2.100105000 0.922141000

H 0.797655000 0.843722000 2.900929000

F -1.164164000 -2.859996000 1.238235000

H -3.591887000 0.844325000 2.260817000

H -3.444232000 -3.819699000 0.463741000

H -5.695414000 -0.236382000 1.458473000

H -5.636656000 -2.573965000 0.559091000

C -6.080345000 0.499003000 -1.916172000

C -4.875086000 0.529874000 -1.708911000

C -3.467854000 0.548506000 -1.473319000

C -2.843308000 1.639096000 -0.824698000

C -2.634080000 -0.527740000 -1.868955000

C -1.471745000 1.689741000 -0.582059000

C -1.253963000 -0.496261000 -1.632222000

C -0.671969000 0.611257000 -0.992805000

H -7.135721000 0.484614000 -2.109122000

F -3.619047000 2.681076000 -0.406637000

H -3.096974000 -1.387971000 -2.359442000

H -1.049427000 2.552369000 -0.063374000

H -0.627324000 -1.333350000 -1.948947000

H 0.402538000 0.636669000 -0.801015000

2Te15

C -0.848244000 -1.395037000 2.470901000

C -1.737113000 -1.607028000 1.658225000

C -2.755606000 -1.787863000 0.674595000

C -4.119261000 -1.581306000 0.982943000

C -2.442696000 -2.127412000 -0.667002000

C -5.134680000 -1.675719000 0.030372000

C -3.446666000 -2.229550000 -1.637594000

C -4.791357000 -2.000960000 -1.293431000

H -0.043715000 -1.212290000 3.162278000

F -4.458531000 -1.247677000 2.262115000

H -1.395476000 -2.282543000 -0.933174000

H -6.169591000 -1.494762000 0.331655000

H -3.178486000 -2.481761000 -2.667614000

H -5.576984000 -2.075249000 -2.051533000

C 2.199123000 -0.843209000 4.599137000

C 2.505996000 -0.322604000 3.534794000

C 2.850285000 0.259127000 2.276957000

C 3.771653000 -0.365729000 1.398161000

C 2.275897000 1.479069000 1.851244000

C 4.083888000 0.207071000 0.159953000

C 2.562860000 2.057010000 0.615145000

C 3.475908000 1.410639000 -0.234474000

H 1.960526000 -1.283630000 5.548339000

H 4.213992000 -1.319671000 1.695319000

F 1.400677000 2.111454000 2.686303000

H 4.777834000 -0.305871000 -0.510846000

H 2.067286000 2.982876000 0.317059000

H 3.693001000 1.843222000 -1.214831000

C 3.594259000 -4.064530000 -0.336310000

C 2.931623000 -3.139823000 -0.786064000

C 2.175868000 -2.029386000 -1.267800000

C 2.406543000 -1.478377000 -2.547503000

C 1.188878000 -1.404914000 -0.462798000

C 1.709201000 -0.367478000 -3.025055000

C 0.485477000 -0.286122000 -0.919831000

C 0.742129000 0.232608000 -2.201333000

H 4.155642000 -4.900104000 0.035541000

F 3.358282000 -2.044275000 -3.345260000

H 0.992944000 -1.808546000 0.531763000

H 1.932321000 0.013782000 -4.024910000

H -0.261291000 0.177966000 -0.272464000

H 0.201225000 1.107939000 -2.564679000

C 0.689926000 4.281174000 -2.321874000

C -0.122302000 3.712184000 -1.605246000

C -1.022489000 3.019358000 -0.741065000

C -2.045366000 2.184832000 -1.247834000

C -0.907003000 3.117669000 0.669453000

C -2.908570000 1.463171000 -0.423338000

C -1.765856000 2.405973000 1.513183000

C -2.765203000 1.581139000 0.969174000

H 1.369335000 4.813000000 -2.960005000

F -2.179605000 2.063889000 -2.600922000

H -0.122867000 3.751726000 1.087583000

H -3.659373000 0.807058000 -0.869549000

H -1.643834000 2.480885000 2.596578000

H -3.422540000 1.011583000 1.629256000

2Te16

C 1.505432000 -2.601033000 0.406731000

C 0.664661000 -2.195952000 1.195306000

C -0.351403000 -1.679117000 2.051400000

C -0.045568000 -1.075141000 3.291487000

C -1.716447000 -1.706476000 1.665728000

C -1.018322000 -0.506023000 4.115650000

C -2.706941000 -1.144635000 2.478718000

C -2.361456000 -0.540868000 3.701321000

H 2.250821000 -2.895184000 -0.306843000

F 1.257392000 -1.034060000 3.700113000

H -1.974580000 -2.154796000 0.705677000

H -0.717041000 -0.044808000 5.059561000

H -3.749115000 -1.160355000 2.148186000

H -3.131766000 -0.088397000 4.332665000

C 4.610294000 -1.995128000 -1.591258000

C 4.271917000 -1.017226000 -0.938765000

C 3.887910000 0.121634000 -0.168750000

C 3.585118000 0.019597000 1.214006000

C 3.805114000 1.405490000 -0.753924000

C 3.238172000 1.153523000 1.958400000

C 3.467874000 2.547420000 -0.027977000

C 3.185674000 2.416312000 1.341683000

H 4.912329000 -2.850649000 -2.164698000

H 3.609934000 -0.965735000 1.683065000

F 4.058559000 1.532798000 -2.089951000

H 2.995484000 1.045635000 3.018344000

H 3.413321000 3.510939000 -0.539898000

H 2.907751000 3.302185000 1.920112000

C -4.031588000 4.554769000 -1.614851000

C -3.086057000 3.866028000 -1.257047000

C -1.978656000 3.056753000 -0.860689000

C -1.980980000 2.351770000 0.364122000

C -0.827598000 2.915826000 -1.682824000

C -0.922741000 1.537984000 0.770771000

C 0.238489000 2.096874000 -1.294117000

C 0.190111000 1.401711000 -0.072408000

H -4.858693000 5.165751000 -1.921785000

F -3.069624000 2.460771000 1.179781000

H -0.803057000 3.451366000 -2.635629000

H -0.991420000 1.014561000 1.724743000

H 1.100365000 1.978777000 -1.953466000

H 1.008104000 0.739663000 0.217089000

C 1.342668000 -0.939607000 -2.808037000

C 0.208371000 -1.249164000 -2.473361000

C -1.122522000 -1.598333000 -2.093717000

C -1.517274000 -2.950437000 -1.967282000

C -2.105135000 -0.610771000 -1.825633000

C -2.811259000 -3.327744000 -1.601064000

C -3.407401000 -0.968855000 -1.456035000

C -3.763891000 -2.325181000 -1.345921000

H 2.357685000 -0.674361000 -3.034082000

F -0.602900000 -3.927545000 -2.217197000

H -1.822678000 0.439324000 -1.908754000

H -3.054306000 -4.390205000 -1.521350000

H -4.142693000 -0.186010000 -1.249375000

H -4.780711000 -2.609386000 -1.058261000

2Te17

C -5.563759000 -3.082421000 -1.100398000

C -5.088453000 -1.984303000 -0.846826000

C -4.509377000 -0.720901000 -0.521443000

C -3.498348000 -0.147781000 -1.325290000

C -4.901831000 0.003792000 0.634245000

C -2.884314000 1.067089000 -1.024506000

C -4.301489000 1.228974000 0.952152000

C -3.294656000 1.761245000 0.125585000

H -6.001351000 -4.033303000 -1.337710000

F -3.093937000 -0.827524000 -2.441179000

H -5.679646000 -0.421429000 1.274009000

H -2.095834000 1.457598000 -1.670964000

H -4.616618000 1.769902000 1.849048000

H -2.821469000 2.714703000 0.370515000

C -1.139787000 4.211065000 -1.732195000

C -0.522159000 3.686418000 -0.816072000

C 0.198936000 3.052246000 0.240290000

C 1.267388000 2.157195000 -0.027546000

C -0.119471000 3.290420000 1.596306000

C 1.978024000 1.552263000 1.014743000

C 0.580316000 2.701756000 2.650537000

C 1.640949000 1.829007000 2.351596000

H -1.669307000 4.685912000 -2.535724000

H 1.513238000 1.946134000 -1.069123000

F -1.155797000 4.131529000 1.888963000

H 2.781740000 0.848394000 0.788533000

H 0.289062000 2.929002000 3.679275000

H 2.185282000 1.339665000 3.163547000

C 0.227607000 -0.989720000 -2.083912000

C 1.425488000 -0.847526000 -1.887278000

C 2.807860000 -0.648669000 -1.595647000

C 3.531133000 0.427659000 -2.159404000

C 3.506764000 -1.492855000 -0.694813000

C 4.866550000 0.687766000 -1.850994000

C 4.847811000 -1.250488000 -0.374247000

C 5.528690000 -0.161393000 -0.947402000

H -0.821727000 -1.127934000 -2.262053000

F 2.890790000 1.261953000 -3.029679000

H 2.973498000 -2.328641000 -0.239766000

H 5.365995000 1.542632000 -2.313973000

H 5.358795000 -1.910481000 0.332563000

H 6.575940000 0.032161000 -0.695005000

C 3.106429000 -1.498344000 3.030044000

C 2.049939000 -1.732544000 2.459979000

C 0.816683000 -2.007566000 1.795493000

C 0.634592000 -3.197561000 1.055496000

C -0.279823000 -1.108725000 1.850608000

C -0.557842000 -3.509787000 0.403853000

C -1.484780000 -1.404231000 1.205244000

C -1.627332000 -2.602722000 0.483401000

H 4.032443000 -1.296923000 3.532782000

F 1.675838000 -4.079201000 0.969265000

H -0.159524000 -0.172829000 2.399372000

H -0.632185000 -4.444790000 -0.156783000

H -2.312259000 -0.694822000 1.259388000

H -2.568552000 -2.831921000 -0.023861000

2Te 18

C -1.917340000 -0.748622000 -2.698825000

C -1.856683000 0.338605000 -2.144698000

C -1.764228000 1.586567000 -1.460290000

C -1.041635000 2.672799000 -2.004915000

C -2.366375000 1.782060000 -0.190358000

C -0.899702000 3.893793000 -1.343673000

C -2.236484000 2.999760000 0.487525000

C -1.503712000 4.055359000 -0.084700000

H -1.914191000 -1.718599000 -3.155982000

F -0.451061000 2.522549000 -3.225705000

H -2.924499000 0.956880000 0.254197000

H -0.320254000 4.692604000 -1.813000000

H -2.699130000 3.121584000 1.470881000

H -1.391522000 5.004113000 0.448220000

C 2.649767000 -4.408822000 -0.426623000

C 2.628838000 -3.270311000 -0.875306000

C 2.592241000 -1.930309000 -1.365425000

C 3.472575000 -0.935262000 -0.866962000

C 1.663890000 -1.534747000 -2.353114000

C 3.406730000 0.380336000 -1.336328000

C 1.575142000 -0.226305000 -2.827755000

C 2.456598000 0.736321000 -2.310792000

H 2.697394000 -5.413806000 -0.053392000

H 4.188409000 -1.214021000 -0.090632000

F 0.813740000 -2.476061000 -2.862808000

H 4.080348000 1.135412000 -0.922772000

H 0.814332000 0.028003000 -3.567056000

H 2.386822000 1.768838000 -2.664376000

C -0.926141000 -3.274165000 -0.114194000

C -1.876270000 -2.639803000 0.321321000

C -2.958096000 -1.844071000 0.802957000

C -2.943377000 -1.295711000 2.106800000

C -4.078904000 -1.538217000 -0.012278000

C -3.961861000 -0.471983000 2.591690000

C -5.114113000 -0.721261000 0.458558000

C -5.055760000 -0.184052000 1.758027000

H -0.058812000 -3.784916000 -0.492206000

F -1.894384000 -1.578465000 2.924952000

H -4.104365000 -1.938332000 -1.027842000

H -3.887171000 -0.074037000 3.606815000

H -5.963527000 -0.494469000 -0.191860000

H -5.859772000 0.460498000 2.125813000

C 5.144159000 1.303745000 3.493444000

C 4.090633000 1.019462000 2.939858000

C 2.873872000 0.663581000 2.283301000

C 2.153903000 1.598619000 1.507470000

C 2.345573000 -0.652564000 2.360058000

C 0.981136000 1.273057000 0.827450000

C 1.171647000 -0.998243000 1.682487000

C 0.491936000 -0.038544000 0.912991000

H 6.060236000 1.560592000 3.989611000

F 2.638902000 2.871398000 1.395459000

H 2.887015000 -1.394554000 2.953337000

H 0.480302000 2.037323000 0.232552000

H 0.784725000 -2.017443000 1.740825000

H -0.408864000 -0.316904000 0.363588000

2Te19

C 4.534863000 -0.912090000 -0.200732000

C 3.753997000 -0.577750000 0.678003000

C 2.786811000 -0.195373000 1.654764000

C 3.081305000 0.744052000 2.668815000

C 1.472767000 -0.728759000 1.626440000

C 2.137893000 1.152445000 3.614668000

C 0.513518000 -0.334725000 2.566178000

C 0.843628000 0.605323000 3.559539000

H 5.198977000 -1.237039000 -0.977596000

F 4.331423000 1.284263000 2.720513000

H 1.221334000 -1.447439000 0.845450000

H 2.424362000 1.885982000 4.372450000

H -0.491617000 -0.759567000 2.523231000

H 0.095750000 0.918087000 4.294655000

C -2.905753000 4.308588000 -2.128238000

C -1.805595000 3.865463000 -1.827877000

C -0.523433000 3.334795000 -1.491552000

C 0.478402000 3.127693000 -2.477354000

C -0.191626000 2.996279000 -0.160070000

C 1.729385000 2.601487000 -2.132300000

C 1.042581000 2.458174000 0.200716000

C 2.009825000 2.258389000 -0.796992000

H -3.861968000 4.720149000 -2.389179000

H 0.247246000 3.386445000 -3.514183000

F -1.120109000 3.209430000 0.820256000

H 2.480588000 2.435127000 -2.908898000

H 1.227559000 2.196843000 1.243612000

H 2.973116000 1.815795000 -0.531734000

C 3.799212000 -4.070991000 -2.205435000

C 2.779863000 -3.437574000 -1.969567000

C 1.577799000 -2.720397000 -1.690119000

C 1.405079000 -1.380251000 -2.106207000

C 0.499436000 -3.325041000 -0.990487000

C 0.241599000 -0.654749000 -1.847368000

C -0.680709000 -2.616052000 -0.729967000

C -0.807402000 -1.281931000 -1.157226000

H 4.691674000 -4.629975000 -2.411876000

F 2.412307000 -0.775718000 -2.797096000

H 0.612991000 -4.360962000 -0.660156000

H 0.171569000 0.383083000 -2.177065000

H -1.500782000 -3.100660000 -0.193496000

H -1.720200000 -0.721162000 -0.954072000

C -4.359297000 -4.203211000 0.845396000

C -4.200139000 -3.001093000 0.685886000

C -3.986686000 -1.606166000 0.471158000

C -3.278643000 -0.819239000 1.407912000

C -4.451804000 -0.952701000 -0.700049000

C -3.014564000 0.536623000 1.213012000

C -4.203968000 0.409945000 -0.909760000

C -3.483817000 1.154963000 0.041918000

H -4.520810000 -5.253142000 0.998607000

F -2.818260000 -1.417739000 2.545326000

H -4.997640000 -1.542957000 -1.440774000

H -2.438321000 1.088614000 1.957986000

H -4.559647000 0.892533000 -1.824439000

H -3.269607000 2.211378000 -0.132162000

2Te20

C -0.847744000 -0.936915000 2.420391000

C 0.144162000 -0.269317000 2.166379000

C 1.289608000 0.503808000 1.813557000

C 1.423286000 1.848195000 2.225194000

C 2.317027000 -0.029200000 0.993213000

C 2.505936000 2.646514000 1.855848000

C 3.411579000 0.754910000 0.615728000

C 3.507902000 2.091253000 1.043780000

H -1.735974000 -1.513155000 2.589729000

F 0.441804000 2.396611000 2.999258000

H 2.224203000 -1.058200000 0.644880000

H 2.541169000 3.687246000 2.186555000

H 4.181971000 0.329109000 -0.032917000

H 4.348984000 2.714085000 0.726994000

C -1.896293000 -3.100853000 -0.367214000

C -0.702587000 -3.279374000 -0.170486000

C 0.697190000 -3.427258000 0.062928000

C 1.225774000 -3.546823000 1.374543000

C 1.623892000 -3.432464000 -1.004503000

C 2.604945000 -3.652987000 1.590757000

C 3.003079000 -3.526397000 -0.809912000

C 3.495294000 -3.637990000 0.501562000

H -2.940044000 -2.912479000 -0.546694000

H 0.530889000 -3.527479000 2.216195000

F 1.154422000 -3.342850000 -2.282025000

H 2.987905000 -3.733131000 2.611882000

H 3.667188000 -3.515849000 -1.677772000

H 4.574130000 -3.710329000 0.668677000

C -5.273394000 -1.991739000 -1.582275000

C -4.782996000 -0.999308000 -1.060801000

C -4.205801000 0.162255000 -0.463583000

C -3.802272000 0.168980000 0.890528000

C -4.018694000 1.362178000 -1.199685000

C -3.231755000 1.283765000 1.505894000

C -3.456923000 2.493964000 -0.598025000

C -3.060812000 2.455600000 0.751433000

H -5.720461000 -2.853010000 -2.040833000

F -3.977551000 -0.967551000 1.628351000

H -4.319214000 1.378789000 -2.250648000

H -2.910309000 1.217854000 2.546929000

H -3.305689000 3.402794000 -1.186541000

H -2.592647000 3.328117000 1.213915000

C 2.887524000 4.586991000 -1.928646000

C 2.269238000 3.531382000 -1.910814000

C 1.569039000 2.287756000 -1.892991000

C 0.394134000 2.114651000 -1.127593000

C 2.028703000 1.168400000 -2.634473000

C -0.301821000 0.906987000 -1.073331000

C 1.340675000 -0.049715000 -2.597720000

C 0.177428000 -0.181388000 -1.817986000

H 3.415897000 5.520495000 -1.957163000

F -0.070443000 3.174314000 -0.403686000

H 2.937078000 1.280978000 -3.232858000

H -1.186153000 0.821373000 -0.441621000

H 1.710520000 -0.903545000 -3.171043000

H -0.355464000 -1.133567000 -1.774927000

2Te21

C 0.960922000 1.040630000 1.114598000

C 2.004694000 0.424498000 0.963908000

C 3.206877000 -0.307088000 0.731125000

C 3.626591000 -1.339392000 1.600825000

C 4.025763000 -0.041003000 -0.397914000

C 4.787364000 -2.084490000 1.389850000

C 5.194768000 -0.777182000 -0.626790000

C 5.577435000 -1.797494000 0.263402000

H 0.038376000 1.579380000 1.210333000

F 2.857884000 -1.628573000 2.693712000

H 3.716407000 0.745552000 -1.089571000

H 5.056898000 -2.870644000 2.099981000

H 5.810671000 -0.554393000 -1.503381000

H 6.491334000 -2.373044000 0.085474000

C 1.959049000 0.114324000 -3.473085000

C 1.385159000 0.993671000 -2.845995000

C 0.703356000 1.986659000 -2.080905000

C -0.690094000 1.902437000 -1.828362000

C 1.399832000 3.076435000 -1.512721000

C -1.335875000 2.867805000 -1.047460000

C 0.774783000 4.047571000 -0.730918000

C -0.606940000 3.938128000 -0.498341000

H 2.455322000 -0.651677000 -4.037018000

H -1.247691000 1.057506000 -2.237072000

F 2.745097000 3.173417000 -1.722095000

H -2.406656000 2.776357000 -0.857485000

H 1.371505000 4.860931000 -0.310476000

H -1.112960000 4.686997000 0.118227000

C -4.621230000 -3.445592000 -2.182456000

C -3.538431000 -3.251340000 -1.647771000

C -2.280417000 -3.035436000 -1.008910000

C -1.381528000 -2.045944000 -1.469811000

C -1.874698000 -3.804466000 0.113052000

C -0.154135000 -1.791889000 -0.857892000

C -0.638190000 -3.576101000 0.731835000

C 0.216490000 -2.566895000 0.252887000

H -5.567906000 -3.625368000 -2.654840000

F -1.732392000 -1.311978000 -2.564372000

H -2.552391000 -4.577682000 0.484778000

H 0.490018000 -1.000929000 -1.245795000

H -0.345871000 -4.178795000 1.596648000

H 1.167230000 -2.367364000 0.750890000

C -4.133963000 0.251717000 -0.903910000

C -3.533454000 0.450707000 0.141816000

C -2.795398000 0.628858000 1.349824000

C -2.726317000 1.875590000 2.011676000

C -2.085417000 -0.452336000 1.932562000

C -1.994025000 2.067932000 3.184737000

C -1.348763000 -0.280688000 3.109661000

C -1.301212000 0.976641000 3.737246000

H -4.649883000 0.043967000 -1.821008000

F -3.405794000 2.938335000 1.488600000

H -2.114291000 -1.420635000 1.430942000

H -1.975985000 3.057917000 3.647269000

H -0.790083000 -1.123647000 3.524757000

H -0.715164000 1.117166000 4.650170000

2Te22

C -6.616589000 -1.220614000 -0.777243000

C -5.708462000 -0.604051000 -0.237730000

C -4.652829000 0.106571000 0.408519000

C -3.724156000 0.875723000 -0.329677000

C -4.489355000 0.074410000 1.818401000

C -2.671430000 1.567102000 0.269261000

C -3.442368000 0.769299000 2.438391000

C -2.529983000 1.509946000 1.664819000

H -7.416328000 -1.758702000 -1.249001000

F -3.866127000 0.951299000 -1.681585000

H -5.199667000 -0.509926000 2.409659000

H -1.977152000 2.130071000 -0.356491000

H -3.334506000 0.727944000 3.526299000

H -1.701352000 2.040335000 2.141817000

C -2.927423000 -2.121021000 -2.063163000

C -2.079524000 -2.265976000 -1.194941000

C -1.110222000 -2.386131000 -0.155135000

C -1.414349000 -2.002294000 1.176021000

C 0.199739000 -2.852582000 -0.410120000

C -0.447743000 -2.083871000 2.185783000

C 1.179718000 -2.933449000 0.580217000

C 0.848347000 -2.545188000 1.889688000

H -3.691836000 -1.978302000 -2.801790000

H -2.412971000 -1.616249000 1.389145000

F 0.527451000 -3.210466000 -1.684518000

H -0.700753000 -1.768037000 3.201927000

H 2.185115000 -3.268678000 0.319736000

H 1.619636000 -2.581788000 2.663383000

C 4.508333000 -2.422584000 2.307767000

C 4.326635000 -1.576903000 1.442761000

C 4.120304000 -0.581337000 0.440457000

C 3.933164000 -0.932746000 -0.916125000

C 4.106458000 0.801691000 0.757368000

C 3.739050000 0.014481000 -1.921717000

C 3.916928000 1.766890000 -0.238618000

C 3.733656000 1.375460000 -1.576258000

H 4.685333000 -3.164414000 3.062660000

F 3.946675000 -2.252792000 -1.258176000

H 4.235910000 1.097570000 1.801412000

H 3.589251000 -0.322328000 -2.950315000

H 3.889776000 2.825715000 0.032157000

H 3.564443000 2.127665000 -2.351551000

C 1.078845000 5.442910000 0.857827000

C 0.881987000 4.352029000 0.340637000

C 0.664527000 3.084816000 -0.278628000

C 0.786569000 1.880287000 0.448981000

C 0.326466000 2.976428000 -1.653740000

C 0.598799000 0.626074000 -0.126185000

C 0.128054000 1.723942000 -2.247890000

C 0.266360000 0.549425000 -1.486171000

H 1.239446000 6.400915000 1.314006000

F 1.098042000 1.949458000 1.775667000

H 0.220491000 3.895376000 -2.236288000

H 0.714011000 -0.263244000 0.490753000

H -0.143486000 1.663361000 -3.305544000

H 0.103253000 -0.427207000 -1.945800000

2Te23

C -2.631324000 -4.769117000 -1.349015000

C -3.015245000 -3.729825000 -0.829660000

C -3.460326000 -2.508243000 -0.240050000

C -3.164822000 -2.191826000 1.104450000

C -4.207759000 -1.555207000 -0.980027000

C -3.573646000 -1.004329000 1.709521000

C -4.625157000 -0.356752000 -0.391762000

C -4.307620000 -0.080036000 0.950053000

H -2.298714000 -5.681460000 -1.805948000

F -2.432199000 -3.080277000 1.838459000

H -4.436288000 -1.772716000 -2.026593000

H -3.291425000 -0.806638000 2.745612000

H -5.175453000 0.377436000 -0.986009000

H -4.608741000 0.869743000 1.400174000

C 0.529264000 -3.565693000 0.111927000

C 1.659537000 -3.107943000 0.016985000

C 2.983431000 -2.583544000 -0.078298000

C 3.996943000 -2.950726000 0.845287000

C 3.345092000 -1.672476000 -1.096138000

C 5.294381000 -2.433008000 0.738248000

C 4.631654000 -1.148123000 -1.222417000

C 5.613921000 -1.534400000 -0.296687000

H -0.478925000 -3.933161000 0.180462000

H 3.740949000 -3.653328000 1.643171000

F 2.394570000 -1.281239000 -1.992212000

H 6.059389000 -2.733610000 1.460454000

H 4.842974000 -0.437867000 -2.025342000

H 6.625423000 -1.125755000 -0.380968000

C -3.418978000 3.795821000 -0.800359000

C -2.664794000 2.923688000 -0.390988000

C -1.819114000 1.892664000 0.114689000

C -1.435227000 0.796874000 -0.689279000

C -1.342443000 1.913547000 1.450225000

C -0.642343000 -0.246280000 -0.214548000

C -0.542388000 0.877796000 1.943907000

C -0.195502000 -0.202725000 1.114405000

H -4.062244000 4.571613000 -1.168158000

F -1.852541000 0.762245000 -1.986484000

H -1.612608000 2.761666000 2.084434000

H -0.371865000 -1.068664000 -0.878197000

H -0.170889000 0.922532000 2.971006000

H 0.434529000 -1.011733000 1.488045000

C 3.376421000 0.650464000 1.377400000

C 2.707661000 1.504587000 0.813742000

C 1.923121000 2.462303000 0.105361000

C 1.484776000 3.661449000 0.709772000

C 1.534747000 2.237460000 -1.240500000

C 0.709785000 4.606590000 0.037487000

C 0.756055000 3.173003000 -1.931849000

C 0.343441000 4.356269000 -1.295217000

H 3.967112000 -0.123390000 1.828223000

F 1.820731000 3.900548000 2.010337000

H 1.840239000 1.303206000 -1.717396000

H 0.392372000 5.510405000 0.563633000

H 0.450587000 2.967928000 -2.961494000

H -0.282733000 5.078729000 -1.826009000

2Te24

C -0.202671000 3.612507000 -2.369190000

C -1.096240000 2.828431000 -2.079954000

C -2.113020000 1.888315000 -1.735005000

C -2.966897000 2.101238000 -0.628627000

C -2.303014000 0.693762000 -2.477201000

C -3.962646000 1.198495000 -0.257720000

C -3.299283000 -0.222677000 -2.122713000

C -4.128532000 0.027509000 -1.015621000

H 0.611108000 4.284815000 -2.562835000

F -2.810893000 3.239583000 0.109520000

H -1.645693000 0.501894000 -3.329343000

H -4.581503000 1.410250000 0.617220000

H -3.415515000 -1.145534000 -2.696098000

H -4.892256000 -0.696859000 -0.721342000

C 1.581318000 0.509913000 -1.459621000

C 2.273868000 -0.437429000 -1.117404000

C 3.078557000 -1.526611000 -0.666638000

C 4.007403000 -1.366410000 0.395390000

C 2.985797000 -2.810966000 -1.248916000

C 4.780946000 -2.443941000 0.844218000

C 3.745298000 -3.897934000 -0.814474000

C 4.649462000 -3.709914000 0.244491000

H 0.981029000 1.356722000 -1.740835000

H 4.110349000 -0.377851000 0.847988000

F 2.117940000 -3.000668000 -2.287392000

H 5.492288000 -2.296008000 1.662401000

H 3.624034000 -4.866546000 -1.306415000

H 5.252466000 -4.553481000 0.594906000

C 3.017330000 4.749876000 -0.763527000

C 2.490026000 3.948347000 -0.004267000

C 1.860231000 3.006626000 0.864302000

C 2.610895000 2.036824000 1.564691000

C 0.453231000 2.991786000 1.047889000

C 2.025613000 1.089073000 2.404343000

C -0.153755000 2.044750000 1.880383000

C 0.629643000 1.094794000 2.559961000

H 3.498801000 5.466488000 -1.401009000

F 3.967357000 2.013507000 1.406034000

H -0.151981000 3.721756000 0.508454000

H 2.659726000 0.359645000 2.913929000

H -1.239968000 2.038899000 1.989982000

H 0.152162000 0.348519000 3.200353000

C -5.313357000 -2.451997000 2.430298000

C -4.281849000 -2.432076000 1.772599000

C -3.104405000 -2.391732000 0.966954000

C -2.110263000 -1.407234000 1.168058000

C -2.897427000 -3.313897000 -0.091515000

C -0.975002000 -1.301529000 0.366120000

C -1.760028000 -3.229368000 -0.903316000

C -0.804559000 -2.221344000 -0.680470000

H -6.202609000 -2.488650000 3.030049000

F -2.285983000 -0.511181000 2.184035000

H -3.652203000 -4.086779000 -0.262139000

H -0.249225000 -0.506563000 0.545400000

H -1.619038000 -3.947685000 -1.716521000

H 0.072230000 -2.137334000 -1.325042000

2Te25

C 0.585646000 1.895157000 -2.296608000

C 1.612627000 1.878265000 -1.632566000

C 2.810657000 1.848675000 -0.858472000

C 2.776398000 1.980170000 0.548090000

C 4.082784000 1.669398000 -1.459407000

C 3.923318000 1.938813000 1.339516000

C 5.245696000 1.625436000 -0.682477000

C 5.168276000 1.760739000 0.714514000

H -0.339402000 1.895487000 -2.840359000

F 1.568553000 2.149412000 1.161274000

H 4.131724000 1.547883000 -2.544329000

H 3.828103000 2.033612000 2.423649000

H 6.212887000 1.463045000 -1.164818000

H 6.075791000 1.712849000 1.323759000

C -0.565030000 -1.240373000 -2.487755000

C -1.598845000 -1.418576000 -1.859177000

C -2.806450000 -1.614472000 -1.125454000

C -4.077755000 -1.354243000 -1.697964000

C -2.783814000 -2.062849000 0.214361000

C -5.251203000 -1.536980000 -0.958011000

C -3.941537000 -2.249976000 0.968329000

C -5.185596000 -1.985117000 0.372720000

H 0.366843000 -1.078743000 -2.994360000

H -4.118291000 -0.988911000 -2.727060000

F -1.577554000 -2.319743000 0.799413000

H -6.218471000 -1.308652000 -1.412792000

H -3.855776000 -2.588032000 2.003721000

H -6.102055000 -2.117222000 0.955705000

C 6.342573000 -1.951583000 -1.025629000

C 5.294763000 -1.789348000 -0.415727000

C 4.081484000 -1.616174000 0.315733000

C 2.837186000 -1.473036000 -0.338950000

C 4.070043000 -1.590852000 1.734230000

C 1.631887000 -1.322334000 0.346790000

C 2.871880000 -1.440313000 2.442568000

C 1.654337000 -1.311701000 1.749933000

H 7.257565000 -2.100189000 -1.566182000

F 2.814623000 -1.490425000 -1.703154000

H 5.021971000 -1.695054000 2.262024000

H 0.700330000 -1.223924000 -0.212451000

H 2.887287000 -1.429590000 3.536618000

H 0.712499000 -1.209340000 2.295446000

C -6.395175000 2.012740000 -0.596039000

C -5.323497000 1.765127000 -0.060836000

C -4.081890000 1.489187000 0.586671000

C -2.853185000 1.565504000 -0.107464000

C -4.025347000 1.136229000 1.959686000

C -1.621740000 1.323063000 0.500545000

C -2.800050000 0.888843000 2.590058000

C -1.600009000 0.987375000 1.863051000

H -7.331768000 2.235881000 -1.069783000

F -2.873569000 1.895406000 -1.431508000

H -4.964361000 1.064532000 2.515142000

H -0.704753000 1.401313000 -0.085100000

H -2.781340000 0.623020000 3.651298000

H -0.637844000 0.809428000 2.350094000
